# Supplementary material for: Imaging of Bubonic Plague Dynamics by In Vivo Tracking of Bioluminescent Yersinia pestis
Source: PubMed Central journal article supplement (PMC3320629; doi:10.1371/journal.pone.0034714), 2012-04-05
Supplement: pone.0034714.s001.pdf [file pone.0034714.s001.pdf]

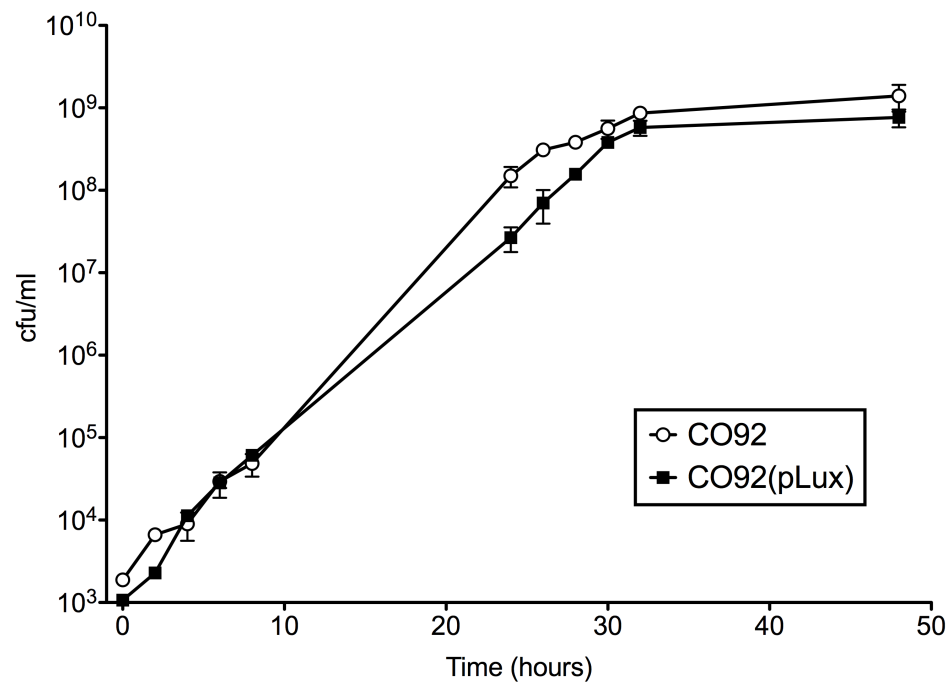

**Figure S1. Comparison of the growth kinetics of CO92 and CO92(pLux).** CO92 (white circles) and CO92(pLux) (black squares) were grown for 48h at 28°C in LB broth and aliquots were taken at various time points for bacterial counts. Shown are mean values and standard error of the means (vertical bars) of triplicate measures.
