# Supplementary material for: Imaging of Bubonic Plague Dynamics by In Vivo Tracking of Bioluminescent Yersinia pestis
Source: PubMed Central journal article supplement (PMC3320629; doi:10.1371/journal.pone.0034714), 2012-04-05
Supplement: pone.0034714.s004.pdf [file pone.0034714.s004.pdf]

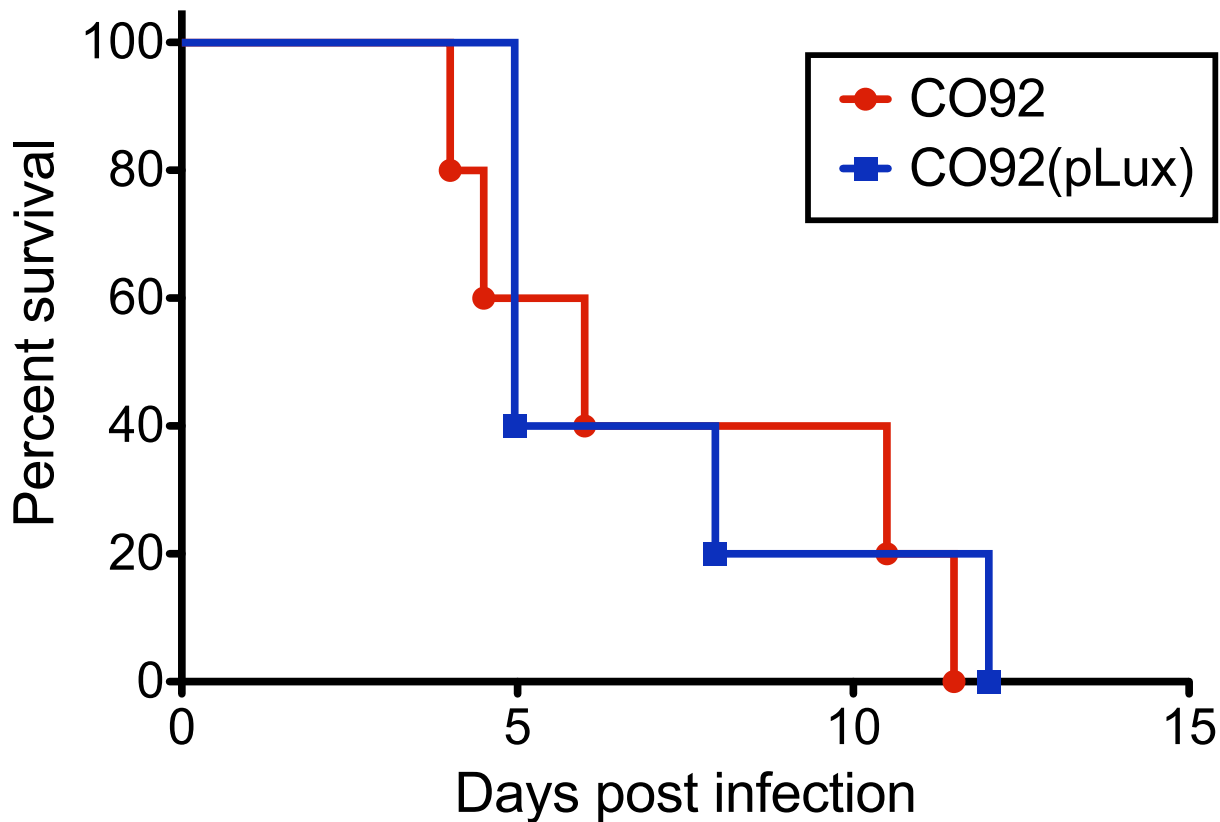

**Figure S4. Survival curves of mice infected with *Y. pestis* CO92 or CO92(pLux)** Groups of five mice were infected subcutaneously with approximately 10 cfu of *Y. pestis* CO92 (red line) or bioluminescent *Y. pestis* CO92(pLux) (blue line) and their mortality was followed daily.
